# Supplementary material for: Brief communication: An empirical relation between centerfrequency and measured thickness for radar sounding of temperateglaciers
Source: Copernicus journal article supplement (doi:10.5194/tc-2021-26), 2021-02-10
Supplement: Supplementary file 2 [file tc-2021-26-supplement.zip]

# Brief communication: An empirical relation between center frequency and measured thickness for radar sounding of temperate glaciers

Joseph A. MacGregor<sup>1</sup>, Michael Studinger<sup>1</sup>, Emily Arnold<sup>2,3</sup>, Carlton J. Leuschen<sup>3</sup>, Fernando Rodríguez-Morales<sup>3</sup>

<sup>1</sup>Cryospheric Sciences Laboratory (Code 615), NASA Goddard Space Flight Center, Greenbelt, Maryland, 20771, United States of America

<sup>2</sup>Aerospace Engineering Dept., The University of Kansas, Lawrence, Kansas, 66045, United States of America

<sup>3</sup>Center for Remote Sensing of Ice Sheets, The University of Kansas, Lawrence, Kansas, 66045, United States of America

*Correspondence to:* Joseph A. MacGregor (joseph.a.macgregor@nasa.gov)

## Readme for supplementary data file T\_supplement.csv

The data in T\_supplement.csv is stored using the American Standard Code for Information Interchange (US-ASCII) and organized as a matrix of rows and comma-separated columns:

|    | A           | B                | C             | D                 |
|----|-------------|------------------|---------------|-------------------|
| 1  | GlaThiDa_ID | SURVEY_FREQUENCY | SURVEY_METHOD | MAXIMUM_THICKNESS |
| 2  | 1           | NaN              | GPRt          | 220               |
| 3  | 2           | NaN              | GPRt          | 175               |
| 4  | 3           | NaN              | GPRt          | 250               |
| 5  | 4           | NaN              | DRlh          | 195               |
| 6  | 5           | NaN              |               | NaN               |
| 7  | 6           |                  | 5 GPRt        | 111               |
| 8  | 7           |                  | 5 GPRt        | 38                |
| 9  | 8           | NaN              |               | NaN               |
| 10 | 9           |                  | 5 GPRt        | NaN               |

The four columns are:

**GlaThiDa\_ID:** Glacier identifier from the Glacier Thickness Database (GlaThiDa) version 3.1.0 (Welty et al., 2020). This column is identical with the GlaThiDa\_ID column from the GlaThiDa compilation.

**SURVEY\_FREQUENCY:** The center frequency of the deployed radar sounder in MHz for the survey that was used for the glacier. For a description of how the frequency was determined see Section 2 of the paper.

**SURVEY\_METHOD:** Survey method from the Glacier Thickness Database (GlaThiDa) version 3.1.0 (Welty et al., 2020).

We have adjusted GlaThiDa's survey method field to further distinguish airborne radar-sounding surveys between helicopter (GPRh) and fixed-wing surveys (GPRa).

**MAXIMUM\_THICKNESS:** Maximum ice thickness in meters. See Section 2 of the paper for a detailed description how this data was compiled.

## References

Welty, E., Zemp, M., Navarro, F., Huss, M., Fürst, J. J., Gärtner-Roer, I., Landmann, J., Machguth, H., Naegeli, K., Andreassen, L. M., Farinotti, D., Li, H., and GlaThiDa Contributors: Worldwide version-controlled database of glacier thickness observations, Earth System Science Data, 12, 3039–3055, doi:10.5194/essd-12-3039-2020, 2020.
