# Supplementary material for: Brief communication: An empirical relation between centerfrequency and measured thickness for radar sounding of temperateglaciers
Source: Copernicus journal article supplement (doi:10.5194/tc-2021-26), 2021-02-10
Supplement: Supplementary file 3 [file tc-2021-26-supplement.zip]

Archive with 2 entries (2 files):
- T_supplement.csv
- T_supplement_readme.pdf
