# Supplementary material for: Brief communication: An empirical relation between centerfrequency and measured thickness for radar sounding of temperateglaciers
Source: Copernicus journal article supplement (doi:10.5194/tc-2021-26), 2021-02-10
Supplement: Supplementary file 3 [file tc-2021-26-supplement.zip › T_supplement.csv]

GlaThiDa_ID	SURVEY_FREQUENCY	SURVEY_METHOD	MAXIMUM_THICKNESS
1	NaN	GPRt	220
2	NaN	GPRt	175
3	NaN	GPRt	250
4	NaN	DRIh	195
5	NaN		NaN
6	5	GPRt	111
7	5	GPRt	38
8	NaN		NaN
9	5	GPRt	NaN
10	5	GPRt	215
11	5	GPRt	25
12	5	GPRt	88
13	5	GPRt	91
14	5	GPRt	59
15	5	GPRt	110
16	5	GPRt	185
17	5	GPRt	65
18	5	GPRt	76
19	5	GPRt	NaN
20	5	GPRt	67
21	5	GPRt	73
22	5	GPRt	133
23	5	GPRt	50
24	5	GPRt	38
25	5	GPRt	49
26	5	GPRt	73
27	5	GPRt	61
28	5	GPRt	146
29	5	GPRt	38
30	5	GPRt	88
31	5	GPRt	98
32	5	GPRt	62
33	100	GPRt	107
34	NaN	SEI	200
35	NaN	GPRa	NaN
36	NaN	GPRa	NaN
37	NaN	GPRa	NaN
38	NaN	GPRa	NaN
39	NaN	GPRt	NaN
40	NaN	GPRt	NaN
41	NaN	GPRt	NaN
42	NaN	GPRt	NaN
43	440	GPRa	NaN
44	440	GPRa	NaN
45	NaN		900
46	440	GPRt	NaN
47	440	GPRa	NaN
48	NaN	SEI	116
49	NaN	SEI	139
50	440	GPRa	NaN
51	440	GPRa	NaN
52	440	GPRa	NaN
53	440	GPRa	NaN
54	440	GPRa	NaN
55	440	GPRa	NaN
56	440	GPRa	NaN
57	440	GPRa	NaN
58	440	GPRa	NaN
59	440	GPRa	NaN
60	440	GPRa	NaN
61	NaN		NaN
62	440	GPRa	NaN
63	440	GPRa	NaN
64	440	GPRa	NaN
65	440	GPRa	NaN
66	440	GPRa	NaN
67	440	GPRa	NaN
68	440	GPRa	NaN
69	440	GPRa	NaN
70	440	GPRa	NaN
71	440	GPRa	NaN
72	440	GPRa	NaN
73	440	GPRa	NaN
74	440	GPRa	NaN
75	440	GPRa	NaN
76	440	GPRa	NaN
77	440	GPRa	NaN
78	440	GPRa	NaN
79	440	GPRa	NaN
80	440	GPRa	NaN
81	440	GPRa	NaN
82	440	GPRa	NaN
83	440	GPRa	NaN
84	440	GPRa	NaN
85	440	GPRa	NaN
86	440	GPRa	NaN
87	440	GPRa	NaN
88	440	GPRa	NaN
89	440	GPRa	NaN
90	440	GPRa	NaN
91	440	GPRt	NaN
92	440	GPRt	NaN
93	NaN	SEI	NaN
94	NaN	SEI	NaN
95	NaN	SEI	NaN
96	NaN	SEI	200
97	NaN	SEI	80
98	NaN	SEI	NaN
99	NaN	SEI	NaN
100	NaN	SEI	92
101	NaN	SEI	290
102	NaN	SEI	NaN
103	NaN	SEI	NaN
104	NaN	SEI	30
105	NaN	SEI	NaN
106	NaN	SEI	NaN
107	NaN	SEI	NaN
108	NaN	SEI	NaN
109	620	GPRa	150
110	620	GPRa	350
111	620	GPRa	140
112	620	GPRa	145
113	620	GPRa	135
114	620	GPRa	95
115	620	GPRa	120
116	620	GPRa	110
117	620	GPRa	110
118	620	GPRa	150
119	620	GPRa	120
120	620	GPRa	150
121	620	GPRa	125
122	620	GPRa	130
123	620	GPRa	175
124	620	GPRa	115
125	620	GPRa	210
126	620	GPRa	185
127	620	GPRa	165
128	620	GPRa	195
129	620	GPRa	320
130	620	GPRa	145
131	620	GPRa	500
132	620	GPRa	110
133	620	GPRa	165
134	620	GPRa	210
135	620	GPRa	310
136	620	GPRa	100
137	620	GPRa	330
138	620	GPRa	165
139	620	GPRa	165
140	620	GPRa	540
141	620	GPRa	120
142	620	GPRa	385
143	620	GPRa	165
144	620	GPRa	120
145	620	GPRa	315
146	620	GPRa	430
147	620	GPRa	140
148	620	GPRa	205
149	620	GPRa	125
150	620	GPRa	430
151	620	GPRa	165
152	620	GPRa	320
153	620	GPRa	330
154	620	GPRa	150
155	620	GPRa	165
156	620	GPRa	210
157	620	GPRa	260
158	620	GPRa	145
159	620	GPRa	180
160	620	GPRa	350
161	620	GPRa	330
162	620	GPRa	350
163	620	GPRa	120
164	620	GPRa	215
165	620	GPRt	120
166	NaN	SEI	576
167	NaN	SEI	375
168	NaN	GPRa	450
169	NaN	GPRa	310
170	NaN	GPRa	310
171	NaN	GPRa	185
172	NaN	GPRa	383
173	NaN	GPRa	290
174	NaN	GPRa	281
175	NaN	GPRa	310
176	NaN	GPRa	102
177	NaN	GPRa	312
178	NaN	GPRa	240
179	NaN	GPRa	298
180	NaN	GPRa	280
181	NaN	GPRa	225
182	NaN	GPRa	210
183	NaN	GPRa	185
184	NaN	GPRa	250
185	NaN	GPRa	238
186	NaN	GPRa	215
187	NaN	GPRa	200
188	NaN	GPRa	145
189	NaN	GPRa	274
190	NaN	GPRa	140
191	NaN	GPRa	210
192	NaN	GPRa	101
193	NaN	GPRa	250
194	NaN		280
195	NaN		300
196	NaN	DRIm	100
197	NaN		NaN
198	NaN		NaN
199	NaN		250
200	NaN	GPRt	172
201	NaN	SEI	1050
202	NaN	SEI	603
203	35	GPRt	NaN
204	840	GPRa	200
206	NaN		NaN
207	NaN		NaN
208	NaN		NaN
209	NaN		NaN
210	NaN		NaN
211	NaN		NaN
212	20	GPRt	162
213	20	GPRt	153
214	3.5	GPRt	750
215	20	GPRt	40
216	20	GPRt	79
217	20	GPRt	500
218	8	GPRt	600
219	NaN	SEI	890
220	NaN	GPRt	300
221	NaN	GPRt	121
222	NaN	GPRt	66
223	620	GPRt	143
224	1.7	SEI	1477
229	NaN	GPRt	580
230	100	GPRa	2500
231	440	GPRt	370
232	NaN	GPRt	20
233	NaN	GPRt	12
234	NaN	GPRt	36
235	NaN	GPRt	120
236	100	GPRt	NaN
237	5	GPRt	NaN
304	NaN	SEI	NaN
305	NaN	SEI	NaN
306	NaN	SEI	NaN
307	NaN	SEI	NaN
308	NaN	SEI	80
309	NaN	SEI	NaN
310	NaN	SEI	17
311	NaN	SEI	NaN
312	NaN	SEI	NaN
313	NaN	SEI	60
314	NaN	SEI	NaN
315	NaN	SEI	105
316	NaN	SEI	NaN
317	NaN	SEI	NaN
318	NaN	SEI	180
319	5	GPRt	270
320	40	GPRt	300
321	NaN	SEI	384
322	25	GPRt	160
323	25	GPRt	200
324	25	GPRt	422
325	NaN	DRIh	121
326	NaN	GPRt	235
333	12.5	GPRt	120
334	20	GPRt	440
335	20	GPRt	157
336	4.2	GPRt	270
337	2.5	GPRt	245
338	5	GPRt	170
339	100	GPRa	819
340	100	GPRa	200
341	345	GPRh	140
343	NaN	GPRt	380
344	NaN	GPRt	NaN
345	NaN	GPRt	NaN
347	NaN	GPRt	560
348	2	GPRa	1250
349	2.2	GPRt	700
350	2.2	GPRt	740
351	NaN	SEI	50
352	NaN	GPRt	1050
358	10	GPRt	80
360	50	GPRt	83
361	50	GPRt	158
362	100	GPRt	36
363	25	GPRt	140
364	25	GPRt	110
365	NaN	SEI	220
366	NaN	GPRt	91
367	NaN	GPRt	113
368	NaN	GPRt	113
369	NaN	GPRt	99
370	NaN	GPRt	148
371	NaN	GPRt	109
372	NaN	GPRt	104
373	NaN	GPRt	122
374	NaN	GPRt	143
375	NaN	GPRt	130
376	NaN	GPRt	126
377	NaN	GPRt	108
378	NaN	GPRt	113
379	NaN	GPRt	113
380	NaN	GPRt	122
381	NaN	GPRt	116
382	NaN	GPRt	120
383	NaN	GPRt	128
384	NaN	GPRt	235
385	NaN	GPRt	147
386	NaN	GPRt	125
387	NaN	GPRt	122
388	NaN	GPRt	134
389	NaN	GPRt	130
390	NaN	GPRt	140
391	NaN	GPRt	194
392	NaN	GPRt	148
393	NaN	GPRt	118
394	NaN	GPRt	185
395	NaN	GPRt	156
396	NaN	GPRt	150
397	NaN	GPRt	128
398	NaN	GPRt	130
399	NaN	GPRt	185
400	NaN	GPRt	88
401	NaN	GPRt	92
402	NaN	GPRt	80
403	NaN	GPRt	101
404	NaN	GPRt	97
405	NaN	GPRt	126
406	NaN	GPRt	118
407	NaN	GPRt	76
408	NaN	GPRt	105
409	NaN	GPRt	113
410	NaN	GPRt	100
411	NaN	GPRt	125
412	NaN	GPRt	113
413	NaN	GPRt	109
414	NaN	GPRt	109
415	NaN	GPRt	113
416	NaN	GPRt	92
417	NaN	GPRt	109
418	NaN	GPRt	105
419	NaN	GPRt	134
420	NaN	GPRt	143
421	NaN	GPRt	109
422	5.5	GPRt	180
423	NaN	GPRa	325
424	NaN	GPRa	330
425	NaN	GPRa	295
426	NaN	GPRa	400
427	NaN	GPRa	170
429	NaN	GPRa	320
431	NaN	GPRa	260
433	NaN	GPRa	220
434	NaN	GPRa	140
435	NaN	GPRa	380
437	NaN	GPRa	100
438	NaN	GPRa	315
440	NaN	GPRa	260
442	NaN	GPRa	200
444	NaN	GPRa	260
446	NaN	GPRa	585
448	NaN	GPRa	320
450	NaN	GPRa	250
451	NaN	GPRa	400
453	NaN	GPRa	160
455	NaN	GPRa	430
457	NaN	GPRa	380
458	NaN	GPRa	330
460	NaN	GPRa	320
462	NaN	GPRa	400
463	NaN	GPRa	300
464	NaN	GPRa	556
466	100	GPRt	72
467	NaN	GPRa	420
468	NaN	GPRa	430
469	NaN	GPRa	350
470	NaN	GPRa	350
471	NaN	GPRa	315
472	NaN	GPRa	320
473	NaN	GPRa	450
474	NaN	GPRa	430
475	NaN	GPRa	390
476	NaN	GPRa	380
477	NaN	GPRa	130
478	NaN	GPRa	300
479	NaN	GPRa	380
480	NaN	GPRa	380
481	NaN	GPRa	230
482	NaN	GPRa	230
483	NaN	GPRa	190
484	NaN	GPRa	200
485	NaN	GPRa	400
486	200	GPRt	52
487	200	GPRt	17
488	200	GPRt	52
489	200	GPRt	13
490	200	GPRt	16
491	NaN	GPRa	NaN
492	NaN	GPRa	NaN
493	NaN	GPRa	NaN
494	NaN	GPRa	NaN
495	NaN	GPRa	NaN
496	NaN	GPRa	NaN
497	NaN	GPRt	226
498	50	GPRt	NaN
500	NaN	GEL	107
501	100	GPRt	82
502	100	GPRt	71
503	NaN	GPRt	140
504	2.5	GPRt	85
505	NaN		132
506	NaN		126
507	30	GPRh	624
508	30	GPRh	799
510	NaN	GPRt	413
511	NaN	GPRt	170
512	2.5	GPRt	617
513	NaN	GPRt	222
514	NaN	GPRt	114
515	NaN	GPRt	94
516	NaN	GPRt	42
525	NaN	GPRt	54
528	1	GPRa	670
529	NaN	GPRt	139
530	NaN	GPRt	98
531	NaN	GPRt	48
532	NaN	GPRt	44
533	NaN	GPRt	97
534	NaN	GPRt	106
535	NaN	GPRt	42
536	NaN	GPRt	117
537	NaN	GPRt	105
538	NaN	GPRt	138
539	NaN	GPRt	75
540	NaN	GPRt	90
541	NaN	GPRt	73
542	NaN	GPRt	192
543	NaN	GPRt	105
544	NaN	GPRt	75
545	NaN	GPRt	89
546	NaN	GPRt	79
548	NaN	GPRt	144
549	NaN	GPRt	263
550	NaN	GPRt	163
551	NaN	GPRt	218
552	NaN	GPRt	214
553	NaN	GPRt	148
554	NaN	DRIh	138
555	100	GPRa	238
556	100	GPRa	291
557	100	GPRa	212
558	100	GPRa	144
559	100	GPRa	230
1933	6.5	GPRt	82
1934	6.5	GPRt	137
1935	6.5	GPRt	83
1936	6.5	GPRt	214
1937	6.5	GPRt	60
1938	NaN	GPRt	44
1939	NaN	GPRt	31
1940	NaN	GPRt	59
1941	NaN	GPRt	47
1942	NaN	GPRt	63
1943	NaN	GPRt	81
1944	NaN	GPRt	33
1945	NaN	GPRt	43
1946	NaN	GPRt	63
1947	6.5	GPRt	163
1948	6.5	GPRt	97
1949	6.5	GPRt	87
1950	6.5	GPRt	69
1951	6.5	GPRt	74
1952	6.5	GPRt	56
1953	6.5	GPRt	107
1954	6.5	GPRt	178
1955	6.5	GPRt	99
1956	6.5	GPRt	108
1957	6.5	GPRt	124
1958	6.5	GPRt	221
1959	6.5	GPRt	55
1960	6.5	GPRt	32
1961	6.5	GPRt	76
1962	6.5	GPRt	201
1963	6.5	GPRt	131
1964	6.5	GPRt	242
1965	6.5	GPRt	155
1966	6.5	GPRt	100
1967	6.5	GPRt	111
1968	6.5	GPRt	119
1969	6.5	GPRt	70
1970	6.5	GPRt	155
1971	6.5	GPRt	147
1972	6.5	GPRt	131
1973	6.5	GPRt	131
1974	6.5	GPRt	187
1975	6.5	GPRt	188
1977	6.5	GPRt	98
1978	6.5	GPRt	42
1979	6.5	GPRt	208
1980	6.5	GPRt	163
1981	6.5	GPRt	167
1982	6.5	GPRt	85
1983	6.5	GPRt	311
1984	6.5	GPRt	78
1985	6.5	GPRt	62
1986	6.5	GPRt	104
1987	6.5	GPRt	117
1988	6.5	GPRt	94
1989	6.5	GPRt	131
1990	6.5	GPRt	197
1991	6.5	GPRt	70
1992	6.5	GPRt	107
1993	6.5	GPRt	94
1994	6.5	GPRt	35
1995	6.5	GPRt	93
1996	6.5	GPRt	142
1997	6.5	GPRt	151
1998	6.5	GPRt	131
1999	6.5	GPRt	153
2000	6.5	GPRt	82
2001	6.5	GPRt	26
2002	6.5	GPRt	110
2003	6.5	GPRt	219
2004	6.5	GPRt	62
2005	6.5	GPRt	129
2006	6.5	GPRt	67
2007	6.5	GPRt	83
2008	6.5	GPRt	80
2009	6.5	GPRt	74
2010	4	GPRt	134
2093	10	GPRt	48
2011	10	GPRt	53
2012	10	GPRt	109
2013	100	GPRa	22
2014	100	GPRa	50
2015	100	GPRa	44
2016	100	GPRa	48
2017	30	GPRh	57
2018	50	GPRa	54
2019	100	GPRa	29
2020	100	GPRa	18
2021	100	GPRa	51
2022	100	GPRa	58
2023	100	GPRa	44
2024	100	GPRa	57
2025	25	GPRa	174
2026	100	GPRa	36
2027	50	GPRh	132
2028	50	GPRh	91
2029	50	GPRh	69
2030	50	GPRh	206
2031	50	GPRh	185
2032	50	GPRh	300
2033	50	GPRh	146
2034	25	GPRh	122
2035	25	GPRh	79
2036	25	GPRh	190
2037	25	GPRh	138
2038	25	GPRh	113
2039	25	GPRh	57
2040	25	GPRh	775
2041	25	GPRh	118
2042	25	GPRh	262
2043	25	GPRh	94
2044	25	GPRh	191
2045	50	GPRh	151
2046	50	GPRh	83
2047	50	GPRh	88
2048	50	GPRh	97
2049	50	GPRh	128
2050	50	GPRh	138
2051	50	GPRh	95
2052	50	GPRh	116
2053	50	GPRh	90
2054	50	GPRh	205
2055	50	GPRh	342
2057	10	GPRh	220
2058	10	GPRh	233
2059	10	GPRh	182
2060	10	GPRh	257
2061	50	GPRt	137
2062	10	GPRh	211
2063	10	GPRh	357
2065	10	GPRh	375
2066	10	GPRh	471
2067	10	GPRh	388
2068	10	GPRh	386
2069	10	GPRh	535
2070	8	GPRh	325
2071	8.1	GPRt	635
2072	20	GPRt	105
2073	20	GPRt	105
2074	20	GPRt	333
2075	25	GPRt	285
2076	25	GPRt	212
2077	5	GPRt	149
2078	10	GPRt	181
2079	10	GPRt	204
2080	195	GPRt	1020
2081	3	GPRt	953
2082	NaN	SEI	633
2083	100	GPRt	141
2084	5	GPRt	185
2085	NaN	GPRt	122
2086	NaN	GPRt	104
2087	NaN	GPRt	140
2088	NaN	GPRt	140
2089	NaN	GPRt	120
2090	20	GPRt	159
2091	25	GPRt	83
2092	50	GPRt	174
2094	7	GPRt	314
2095	100	GPRt	14
2096	100	GPRt	66
2097	100	GPRt	72
2098	100	GPRt	177
2099	100	GPRt	148
2100	300	GPRt	121
2101	5	GPRt	154
2102	100	GPRt	68
2103	100	GPRt	169
2104	9	GPRt	241
2105	9	GPRt	158
2106	9	GPRt	241
2107	9	GPRt	163
2108	10	GPRt	557
2109	20	GPRt	191
2110	20	GPRt	108
2111	20	GPRt	106
2112	20	GPRt	190
2113	20	GPRt	266
2114	20	GPRt	64
2115	20	GPRt	122
2116	20	GPRt	87
2117	20	GPRt	106
2118	20	GPRt	87
2119	20	GPRt	103
2120	20	GPRt	103
2121	20	GPRt	214
2122	20	GPRt	51
2123	15	GPRt	191
2124	100	GPRt	54
2125	30	GPRh	436
2126	70	GPRh	252
2127	70	GPRh	35
2128	70	GPRh	57
2129	NaN	GPRh	32
2130	70	GPRh	85
2131	70	GPRh	229
2132	70	GPRh	168
2133	70	GPRh	147
2134	NaN	GPRh	256
2135	70	GPRh	259
2136	70	GPRh	60
2137	70	GPRh	111
2138	70	GPRh	53
2139	70	GPRh	53
2140	70	GPRh	32
2141	70	GPRh	156
2142	70	GPRh	138
2143	30	GPRh	452
2144	102.5	GPRh	127
2145	70	GPRh	252
2146	30	GPRh	58
2147	70	GPRh	238
2148	102.5	GPRh	590
2149	102.5	GPRh	386
2150	25	GPRt	245
2151	30	GPRh	52
2152	70	GPRh	107
2153	102.5	GPRh	76
2154	70	GPRh	116
2155	70	GPRh	89
2156	30	GPRh	168
2157	30	GPRh	131
2158	70	GPRh	172
2159	30	GPRh	106
2160	70	GPRh	190
2161	70	GPRh	247
2162	70	GPRh	156
2163	102.5	GPRh	73
2164	70	GPRh	183
2165	30	GPRh	140
2166	70	GPRh	138
2167	70	GPRh	271
2168	30	GPRh	256
2169	70	GPRh	180
2170	102.5	GPRh	157
2171	NaN	GPRh	146
2172	70	GPRh	90
2173	30	GPRh	77
2174	30	GPRh	65
2175	70	GPRh	90
2176	70	GPRh	83
2177	70	GPRh	57
2178	70	GPRh	173
2179	30	GPRh	333
2180	70	GPRh	147
2181	70	GPRh	223
2182	70	GPRh	116
2183	70	GPRh	100
2184	30	GPRh	364
2185	30	GPRh	157
2186	70	GPRh	220
2187	70	GPRh	271
2188	60	GPRa	451
2189	20	GPRt	387
2190	60	GPRa	422
2191	60	GPRa	581
2192	20	GPRt	565
2193	60	GPRa	471
2194	20	GPRt	439
2195	60	GPRa	582
2196	20	GPRt	500
2197	60	GPRa	480
2198	60	GPRa	496
2199	60	GPRa	250
2200	60	GPRa	180
2201	60	GPRa	343
2202	60	GPRa	204
2203	10	GPRt	357
2204	10	GPRt	359
2205	60	GPRa	315
2206	60	GPRa	261
2207	60	GPRa	324
2208	10	GPRt	299
2209	60	GPRa	242
2210	60	GPRa	202
2211	60	GPRa	220
2212	60	GPRa	316
2213	60	GPRa	224
2214	60	GPRa	353
2215	10	GPRt	376
2216	10	GPRt	376
2217	60	GPRa	330
2218	60	GPRa	309
2219	60	GPRa	273
2220	60	GPRa	183
2221	60	GPRa	301
2222	60	GPRa	313
2223	60	GPRa	600
2224	60	GPRa	296
2225	60	GPRa	325
2226	60	GPRa	206
2227	60	GPRa	261
2228	60	GPRa	177
2229	60	GPRa	184
2230	60	GPRa	110
2231	60	GPRa	203
2232	60	GPRa	209
2233	60	GPRa	182
2234	60	GPRa	209
2235	60	GPRa	119
2236	60	GPRa	162
2237	25	GPRt	349
2238	25	GPRt	168
2239	60	GPRa	102
2240	25	GPRt	82
2241	20	GPRt	454
2242	60	GPRh	256
2243	60	GPRh	241
2244	30	GPRt	269
2245	60	GPRh	230
2246	60	GPRh	313
2247	NaN	DRIh	206
2248	NaN	DRIh	330
2249	NaN	DRIh	290
2250	25	GPRt	387
2251	20	GPRh	317
2252	60	GPRh	219
2253	25	GPRt	123
2254	20	GPRt	544
2255	20	GPRh	619
2256	NaN	DRIm	586
2257	25	GPRt	305
2258	20	GPRh	526
2259	60	GPRh	225
2260	25	GPRt	279
2261	60	GPRh	19
2262	60	GPRa	166
2263	60	GPRa	277
2264	60	GPRa	252
2265	60	GPRa	286
2266	60	GPRa	292
2267	60	GPRa	256
2268	60	GPRa	320
2269	60	GPRa	213
2270	60	GPRa	199
2271	60	GPRa	203
2272	60	GPRa	235
2273	60	GPRa	322
2274	60	GPRa	233
2275	60	GPRa	79
2276	60	GPRa	345
2277	60	GPRa	176
2278	60	GPRa	311
2279	20	GPRt	647
2280	20	GPRh	618
2281	20	GPRt	534
2282	60	GPRa	428
2283	60	GPRa	321
2284	60	GPRa	255
2285	60	GPRa	223
2286	60	GPRa	296
2287	60	GPRa	208
2288	60	GPRa	410
2289	60	GPRa	326
2290	30	GPRt	284
2291	30	GPRt	251
2292	50	GPRt	79
2293	50	GPRt	122
2294	12.5	GPRt	247
2295	50	GPRt	220
2296	50	GPRt	231
2297	6.5	GPRt	228
2298	50	GPRt	162
2299	50	GPRt	134
2300	12.5	GPRt	257
2301	50	GPRt	256
2302	50	GPRt	162
2303	50	GPRt	252
2304	50	GPRt	172
2305	12.5	GPRt	68
2306	50	GPRt	91
2307	60	GPRa	318
2308	12.5	GPRt	301
2309	50	GPRt	281
2310	50	GPRt	279
2311	50	GPRt	213
2312	6.5	GPRt	267
2313	60	GPRa	258
2314	60	GPRa	241
2315	60	GPRa	308
2316	60	GPRa	475
2317	60	GPRa	584
2318	60	GPRa	563
2319	20	GPRt	592
2320	60	GPRa	270
2321	60	GPRa	438
2322	60	GPRa	401
2323	8	GPRt	338
2324	60	GPRa	146
2325	NaN	DRIh	124
2326	12.5	GPRt	184
2327	50	GPRt	176
2328	50	GPRt	163
2329	5	GPRt	183
2330	25	GPRt	418
2331	60	GPRa	120
2332	NaN	DRIh	107
2333	NaN	DRIh	106
2334	12.5	GPRt	123
2335	60	GPRa	235
2336	60	GPRa	371
2337	8	GPRt	328
2338	12.5	GPRt	293
2339	60	GPRa	304
2340	8	GPRt	278
2341	12.5	GPRt	252
2342	8	GPRt	297
2343	10	GPRt	48
2344	10	GPRt	143
2345	10	GPRh	135
2346	10	GPRh	85
2347	10	GPRt	384
2348	10	GPRh	298
2349	10	GPRh	344
2350	60	GPRa	375
2351	60	GPRa	227
2352	10	GPRt	283
2353	10	GPRt	393
2354	10	GPRh	210
2355	60	GPRa	592
2356	NaN	DRIh	567
2357	20	GPRt	590
2358	60	GPRa	557
2359	20	GPRt	581
2360	10	GPRh	421
2361	15	GPRt	613
2362	60	GPRa	429
2363	20	GPRt	395
2364	60	GPRa	573
2365	20	GPRt	567
2366	60	GPRa	531
2367	20	GPRt	459
2368	60	GPRa	362
2369	60	GPRa	135
2370	60	GPRa	358
2371	60	GPRa	371
2372	20	GPRt	399
2373	60	GPRa	149
2374	60	GPRa	196
2375	60	GPRa	307
2376	60	GPRa	351
2377	60	GPRa	133
2378	NaN	DRIm	86
2379	60	GPRa	220
2380	60	GPRa	319
2381	60	GPRa	251
2382	60	GPRa	355
2383	60	GPRa	300
2384	60	GPRa	297
2385	60	GPRa	266
2386	60	GPRa	658
2387	60	GPRa	280
2388	60	GPRa	383
2389	60	GPRa	265
2390	60	GPRa	172
2391	60	GPRa	196
2392	60	GPRa	232
2393	60	GPRa	205
2394	60	GPRa	194
2395	60	GPRa	221
2396	60	GPRa	252
2397	60	GPRa	264
2398	60	GPRa	201
2399	60	GPRa	75
2400	60	GPRa	313
2401	60	GPRa	329
2402	60	GPRa	163
2403	NaN	DRIm	211
2404	60	GPRa	231
2405	30	GPRt	50
2406	60	GPRa	219
2407	60	GPRa	428
2408	60	GPRa	241
2409	10	GPRt	396
2410	10	GPRt	370
2411	60	GPRa	310
2412	25	GPRt	13
2413	60	GPRa	346
2414	25	GPRt	339
2415	60	GPRa	223
2416	60	GPRa	287
2417	60	GPRa	158
2418	60	GPRa	434
2419	12.5	GPRt	595
2420	10	GPRt	261
2421	10	GPRt	294
2422	60	GPRa	599
2423	10	GPRt	397
2424	10	GPRt	512
2425	10	GPRt	570
2426	10	GPRh	549
2427	10	GPRh	455
2428	10	GPRh	573
2429	10	GPRh	261
2430	60	GPRa	277
2431	12.5	GPRt	179
2432	10	GPRt	336
2433	10	GPRt	441
2434	10	GPRt	394
2435	10	GPRh	399
2436	10	GPRh	329
2437	10	GPRh	435
2438	60	GPRa	260
2439	60	GPRa	223
2440	60	GPRa	249
2441	60	GPRa	258
2442	60	GPRa	410
2443	60	GPRa	340
2444	60	GPRa	418
2445	60	GPRa	251
2446	60	GPRa	163
2447	10	GPRt	351
2448	10	GPRt	335
2449	60	GPRa	394
2450	60	GPRa	380
2451	8	GPRt	446
2452	12.5	GPRt	410
2453	8	GPRt	433
2454	10	GPRt	144
2455	10	GPRt	152
2456	10	GPRt	127
2457	10	GPRh	144
2458	10	GPRh	100
2459	10	GPRt	443
2460	60	GPRa	403
2461	10	GPRt	206
2462	60	GPRa	557
2463	10	GPRh	477
2464	10	GPRh	546
2465	10	GPRh	537
2466	10	GPRh	462
2467	10	GPRh	733
2468	60	GPRa	129
2469	15	GPRt	231
2470	60	GPRa	319
2471	60	GPRa	248
2472	10	GPRt	349
2473	10	GPRt	354
2474	60	GPRa	436
2475	10	GPRt	74
2476	60	GPRa	359
2477	60	GPRa	293
2478	10	GPRt	361
2479	10	GPRt	375
2480	60	GPRa	518
2481	60	GPRa	264
2482	60	GPRa	436
2483	NaN	DRIm	135
2484	60	GPRa	333
2485	60	GPRa	138
2486	NaN	DRIm	208
2487	60	GPRa	245
2488	10	GPRt	345
2489	60	GPRa	317
2490	60	GPRa	367
2491	60	GPRa	161
2492	60	GPRa	330
2493	60	GPRa	724
2494	60	GPRa	159
2495	60	GPRa	281
2496	60	GPRa	287
2497	NaN	DRIm	126
2498	60	GPRa	390
2499	60	GPRa	152
2500	150	GPRa	442
2501	150	GPRa	642
2502	150	GPRa	465
2503	150	GPRa	193
2504	150	GPRa	629
2505	150	GPRa	594
2506	150	GPRa	564
2507	150	GPRa	460
2508	150	GPRa	642
2509	150	GPRa	479
2510	150	GPRa	1237
2511	150	GPRa	497
2512	150	GPRa	205
2513	150	GPRa	386
2514	150	GPRa	393
2515	150	GPRa	370
2516	150	GPRa	547
2517	150	GPRa	30
2518	150	GPRa	625
2519	150	GPRa	64
2520	150	GPRa	794
2521	150	GPRa	883
2522	150	GPRa	866
2523	150	GPRa	574
2524	150	GPRa	600
2525	150	GPRa	515
2526	150	GPRa	857
2527	150	GPRa	225
2528	150	GPRa	887
2529	150	GPRa	813
2530	150	GPRa	936
2531	150	GPRa	723
2532	150	GPRa	908
2533	150	GPRa	891
2534	150	GPRa	541
2535	150	GPRa	324
2536	150	GPRa	371
2537	150	GPRa	456
2538	150	GPRa	420
2539	150	GPRa	501
2540	150	GPRa	375
2541	150	GPRa	514
2542	150	GPRa	235
2543	150	GPRa	52
2544	150	GPRa	172
2545	150	GPRa	180
2546	150	GPRa	99
2547	150	GPRa	181
2548	150	GPRa	225
2549	150	GPRa	215
2550	150	GPRa	82
2551	150	GPRa	334
2552	150	GPRa	245
2553	150	GPRa	638
2554	150	GPRa	251
2555	150	GPRa	478
2556	150	GPRa	1026
2557	150	GPRa	541
2558	150	GPRa	366
2559	150	GPRa	562
2560	150	GPRa	467
2561	150	GPRa	273
2562	150	GPRa	459
2563	150	GPRa	245
2564	150	GPRa	326
2565	150	GPRa	516
2566	150	GPRa	449
2567	150	GPRa	150
2568	150	GPRa	86
2569	150	GPRa	164
2570	150	GPRa	255
2571	150	GPRa	107
2572	150	GPRa	172
2573	150	GPRa	18
2574	150	GPRa	275
2575	150	GPRa	69
2576	150	GPRa	50
2577	150	GPRa	327
2578	150	GPRa	401
2579	150	GPRa	294
2580	150	GPRa	42
2581	150	GPRa	217
2582	150	GPRa	231
2583	150	GPRa	326
2584	150	GPRa	640
2585	150	GPRa	346
2586	150	GPRa	486
2587	150	GPRa	530
2588	150	GPRa	574
2589	150	GPRa	516
2590	150	GPRa	617
2591	150	GPRa	269
2592	150	GPRa	148
2593	150	GPRa	160
2594	150	GPRa	526
2595	150	GPRa	512
2596	150	GPRa	287
2597	150	GPRa	161
2598	150	GPRa	570
2599	150	GPRa	684
2600	150	GPRa	811
2601	150	GPRa	898
2602	150	GPRa	621
2603	150	GPRa	298
2604	150	GPRa	913
2605	150	GPRa	300
2606	150	GPRa	669
2607	150	GPRa	459
2608	150	GPRa	411
2609	150	GPRa	1063
2610	150	GPRa	143
2611	150	GPRa	63
2612	150	GPRa	832
2613	150	GPRa	378
2614	150	GPRa	145
2615	150	GPRa	829
2616	150	GPRa	732
2617	150	GPRa	129
2618	150	GPRa	424
2619	150	GPRa	695
2620	150	GPRa	303
2621	150	GPRa	704
2622	150	GPRa	294
2623	150	GPRa	249
2624	150	GPRa	32
2625	150	GPRa	152
2626	150	GPRa	192
2627	150	GPRa	306
2628	150	GPRa	153
2629	150	GPRa	655
2630	150	GPRa	766
2631	150	GPRa	179
2632	150	GPRa	94
2633	150	GPRa	45
2634	150	GPRa	238
2635	150	GPRa	909
2636	150	GPRa	773
2637	150	GPRa	659
2638	150	GPRa	659
2639	150	GPRa	327
2640	150	GPRa	667
2641	150	GPRa	869
2642	150	GPRa	591
2643	150	GPRa	524
2644	150	GPRa	645
2645	150	GPRa	462
2646	150	GPRa	381
2647	150	GPRa	476
2648	150	GPRa	431
2649	150	GPRa	510
2650	150	GPRa	562
2651	150	GPRa	660
2652	150	GPRa	444
2653	150	GPRa	97
2654	150	GPRa	1504
2655	150	GPRa	169
2656	150	GPRa	1205
2657	150	GPRa	546
2658	150	GPRa	700
2659	150	GPRa	736
2660	150	GPRa	851
2661	150	GPRa	891
2662	150	GPRa	459
2663	150	GPRa	646
2664	150	GPRa	782
2665	150	GPRa	915
2666	150	GPRa	655
2667	150	GPRa	689
2668	150	GPRa	585
2669	150	GPRa	696
2670	150	GPRa	691
2671	150	GPRa	924
2672	150	GPRa	809
2673	150	GPRa	416
2674	150	GPRa	1111
2675	150	GPRa	598
2676	150	GPRa	34
2677	150	GPRa	39
2678	150	GPRa	277
2679	150	GPRa	255
2680	150	GPRa	311
2681	150	GPRa	54
2682	150	GPRa	104
2683	150	GPRa	292
2684	150	GPRa	297
2685	150	GPRa	256
2686	150	GPRa	610
2687	150	GPRa	111
2688	150	GPRa	236
2689	150	GPRa	465
2690	150	GPRa	527
2691	150	GPRa	546
2692	150	GPRa	527
2693	150	GPRa	68
2694	150	GPRa	154
2695	150	GPRa	276
2696	150	GPRa	180
2697	150	GPRa	308
2698	150	GPRa	279
2699	150	GPRa	156
2700	150	GPRa	657
2701	150	GPRa	622
2702	150	GPRa	644
2703	150	GPRa	553
2704	150	GPRa	371
2705	150	GPRa	836
2706	150	GPRa	742
2707	150	GPRa	561
2708	150	GPRa	614
2709	150	GPRa	827
2710	150	GPRa	727
2711	150	GPRa	177
2712	150	GPRa	708
2713	150	GPRa	671
2714	150	GPRa	42
2715	150	GPRa	638
2716	150	GPRa	767
2717	150	GPRa	756
2718	150	GPRa	609
2719	150	GPRa	850
2720	150	GPRa	246
2721	150	GPRa	624
2722	150	GPRa	449
2723	150	GPRa	391
2724	150	GPRa	795
2725	150	GPRa	314
2726	150	GPRa	655
2727	150	GPRa	574
2728	150	GPRa	613
2729	150	GPRa	587
2730	150	GPRa	678
2731	150	GPRa	196
2732	150	GPRa	499
2733	150	GPRa	473
2734	150	GPRa	563
2735	150	GPRa	7
2736	150	GPRa	85
2737	150	GPRa	424
2738	150	GPRa	407
2739	150	GPRa	268
2740	150	GPRa	390
2741	150	GPRa	461
2742	150	GPRa	382
2743	150	GPRa	517
2744	150	GPRa	436
2745	150	GPRa	424
2746	150	GPRa	801
2747	150	GPRa	410
2748	150	GPRa	479
2749	150	GPRa	186
2750	150	GPRa	259
2751	150	GPRa	241
2752	150	GPRa	461
2753	150	GPRa	753
2754	150	GPRa	636
2755	150	GPRa	406
2756	150	GPRa	422
2757	150	GPRa	371
2758	150	GPRa	471
2759	150	GPRa	672
2760	150	GPRa	221
2761	150	GPRa	480
2762	150	GPRa	468
2763	150	GPRa	555
2764	60	GPRa	277
2765	60	GPRa	202
2766	60	GPRa	4
2767	60	GPRa	120
2768	60	GPRa	3151
2769	60	GPRa	372
2770	60	GPRa	397
2771	60	GPRa	906
2772	60	GPRa	850
2773	60	GPRa	631
2774	60	GPRa	331
2775	60	GPRa	493
2776	60	GPRa	1152
2777	60	GPRa	556
2778	60	GPRa	697
2779	60	GPRa	176
2780	60	GPRa	1117
2781	60	GPRa	35
2782	60	GPRa	11
2783	60	GPRa	25
2784	60	GPRa	6
2785	60	GPRa	41
2786	60	GPRa	158
2787	60	GPRa	39
2788	60	GPRa	394
2789	60	GPRa	11
2790	60	GPRa	NaN
2791	60	GPRa	NaN
2792	60	GPRa	156
2793	60	GPRa	91
2794	60	GPRa	126
2795	60	GPRa	200
2796	60	GPRa	1
2797	60	GPRa	213
2798	60	GPRa	223
2799	60	GPRa	NaN
2800	60	GPRa	151
2801	60	GPRa	292
2802	195	GPRa	398
2803	195	GPRa	442
2804	195	GPRa	724
2805	195	GPRa	407
2806	195	GPRa	168
2807	195	GPRa	172
2808	195	GPRa	168
2809	195	GPRa	145
2810	195	GPRa	373
2811	195	GPRa	NaN
2812	195	GPRa	1408
2813	195	GPRa	67
2814	195	GPRa	67
2815	195	GPRa	NaN
2816	195	GPRa	81
2817	195	GPRa	99
2818	195	GPRa	48
2819	195	GPRa	1985
2820	195	GPRa	179
2821	195	GPRa	NaN
2822	195	GPRa	1492
2823	195	GPRa	1751
2824	195	GPRa	1195
2825	195	GPRa	24
2826	195	GPRa	84
2827	195	GPRa	NaN
2828	195	GPRa	44
2829	195	GPRa	NaN
2830	195	GPRa	NaN
2831	195	GPRa	54
2832	195	GPRa	NaN
2833	195	GPRa	940
2834	195	GPRa	1059
2835	195	GPRa	836
2836	195	GPRa	NaN
2837	195	GPRa	611
2838	195	GPRa	NaN
2839	195	GPRa	NaN
2840	195	GPRa	294
2841	195	GPRa	NaN
2842	195	GPRa	288
2843	195	GPRa	NaN
2844	195	GPRa	NaN
2845	195	GPRa	79
2846	195	GPRa	NaN
2847	195	GPRa	NaN
2848	195	GPRa	NaN
2849	195	GPRa	NaN
2850	195	GPRa	365
2851	195	GPRa	NaN
2852	195	GPRa	30
2853	195	GPRa	108
2854	195	GPRa	68
2855	195	GPRa	NaN
2856	195	GPRa	58
2857	195	GPRa	NaN
2858	195	GPRa	NaN
2859	195	GPRa	NaN
2860	195	GPRa	NaN
2861	195	GPRa	NaN
2862	195	GPRa	NaN
2863	195	GPRa	NaN
2864	195	GPRa	NaN
2865	195	GPRa	18
2866	195	GPRa	NaN
2867	195	GPRa	27
2868	195	GPRa	NaN
2869	195	GPRa	64
2870	195	GPRa	NaN
2871	195	GPRa	NaN
2872	195	GPRa	NaN
2873	195	GPRa	55
2874	195	GPRa	NaN
2875	195	GPRa	NaN
2876	195	GPRa	NaN
2877	195	GPRa	102
2878	195	GPRa	NaN
2879	195	GPRa	NaN
2880	195	GPRa	45
2881	195	GPRa	NaN
2882	195	GPRa	95
2883	195	GPRa	NaN
2884	195	GPRa	53
2885	195	GPRa	91
2886	195	GPRa	NaN
2887	195	GPRa	79
2888	195	GPRa	NaN
2889	195	GPRa	NaN
2890	195	GPRa	50
2891	195	GPRa	39
2892	195	GPRa	55
2893	195	GPRa	167
2894	195	GPRa	51
2895	195	GPRa	1359
2896	195	GPRa	1303
2897	195	GPRa	1666
2898	195	GPRa	87
2899	195	GPRa	NaN
2900	195	GPRa	NaN
2901	195	GPRa	NaN
2902	195	GPRa	NaN
2903	195	GPRa	NaN
2904	195	GPRa	263
2905	195	GPRa	216
2906	195	GPRa	NaN
2907	195	GPRa	73
2908	195	GPRa	229
2909	195	GPRa	292
2910	195	GPRa	599
2911	195	GPRa	NaN
2912	195	GPRa	NaN
2913	195	GPRa	NaN
2914	195	GPRa	NaN
2915	195	GPRa	NaN
2916	195	GPRa	NaN
2917	195	GPRa	NaN
2918	195	GPRa	NaN
2919	195	GPRa	NaN
2920	195	GPRa	NaN
2921	195	GPRa	NaN
2922	195	GPRa	NaN
2923	195	GPRa	NaN
2924	195	GPRa	NaN
2925	195	GPRa	NaN
2926	195	GPRa	NaN
2927	195	GPRa	NaN
2928	195	GPRa	NaN
2929	195	GPRa	NaN
2930	195	GPRa	NaN
2931	195	GPRa	NaN
2932	195	GPRa	NaN
2933	195	GPRa	NaN
2934	195	GPRa	NaN
2935	195	GPRa	NaN
2936	195	GPRa	NaN
2937	195	GPRa	NaN
2938	195	GPRa	NaN
2939	195	GPRa	180
2940	195	GPRa	107
2941	195	GPRa	62
2942	195	GPRa	NaN
2943	195	GPRa	NaN
2944	195	GPRa	NaN
2945	195	GPRa	NaN
2946	195	GPRa	459
2947	195	GPRa	NaN
2948	195	GPRa	NaN
2949	195	GPRa	NaN
2950	195	GPRa	2076
2951	195	GPRa	NaN
2952	195	GPRa	NaN
2953	195	GPRa	NaN
2954	195	GPRa	15
2955	195	GPRa	NaN
2956	195	GPRa	NaN
2957	195	GPRa	NaN
2958	195	GPRa	NaN
2959	195	GPRa	NaN
2960	195	GPRa	NaN
2961	195	GPRa	NaN
2962	195	GPRa	NaN
2963	195	GPRa	NaN
2964	195	GPRa	NaN
2965	195	GPRa	NaN
2966	195	GPRa	NaN
2967	195	GPRa	NaN
2968	195	GPRa	NaN
2969	195	GPRa	NaN
2970	195	GPRa	NaN
2971	195	GPRa	NaN
2972	195	GPRa	NaN
2973	195	GPRa	NaN
2974	195	GPRa	NaN
2975	195	GPRa	NaN
2976	195	GPRa	NaN
2977	195	GPRa	NaN
2978	195	GPRa	NaN
2979	195	GPRa	NaN
2980	195	GPRa	NaN
2981	195	GPRa	NaN
2982	195	GPRa	NaN
2983	195	GPRa	NaN
2984	195	GPRa	NaN
2985	195	GPRa	NaN
2986	195	GPRa	NaN
2987	195	GPRa	NaN
2988	195	GPRa	NaN
2989	195	GPRa	NaN
2990	195	GPRa	NaN
2991	195	GPRa	NaN
2992	195	GPRa	NaN
2993	195	GPRa	NaN
2994	195	GPRa	NaN
2995	195	GPRa	NaN
2996	195	GPRa	NaN
2997	195	GPRa	NaN
2998	195	GPRa	NaN
2999	195	GPRa	NaN
3000	195	GPRa	NaN
3001	195	GPRa	NaN
3002	195	GPRa	NaN
3003	195	GPRa	NaN
3004	195	GPRa	NaN
3005	195	GPRa	NaN
3006	195	GPRa	NaN
3007	195	GPRa	NaN
3008	195	GPRa	NaN
3009	195	GPRa	NaN
3010	195	GPRa	NaN
3011	195	GPRa	NaN
3012	195	GPRa	NaN
3013	195	GPRa	NaN
3014	195	GPRa	NaN
3015	195	GPRa	NaN
3016	195	GPRa	NaN
3017	195	GPRa	NaN
3018	195	GPRa	NaN
3019	195	GPRa	NaN
3020	195	GPRa	NaN
3021	195	GPRa	1237
3022	195	GPRa	NaN
3023	195	GPRa	NaN
3024	195	GPRa	NaN
3025	195	GPRa	NaN
3026	195	GPRa	NaN
3027	195	GPRa	NaN
3028	195	GPRa	129
3029	195	GPRa	150
3030	195	GPRa	1203
3031	195	GPRa	NaN
3032	195	GPRa	NaN
3033	195	GPRa	191
3034	195	GPRa	NaN
3035	195	GPRa	93
3036	195	GPRa	113
3037	195	GPRa	1831
3038	195	GPRa	NaN
3039	195	GPRa	141
3040	195	GPRa	NaN
3041	195	GPRa	1443
3042	195	GPRa	1376
3043	195	GPRa	NaN
3044	195	GPRa	1249
3045	195	GPRa	NaN
3046	195	GPRa	NaN
3047	195	GPRa	102
3048	195	GPRa	190
3049	195	GPRa	335
3050	195	GPRa	75
3051	195	GPRa	893
3052	195	GPRa	374
3053	195	GPRa	NaN
3054	195	GPRa	NaN
3055	195	GPRa	NaN
3056	195	GPRa	607
3057	195	GPRa	NaN
3058	195	GPRa	NaN
3059	195	GPRa	NaN
3060	195	GPRa	NaN
3061	195	GPRa	90
3062	195	GPRa	48
3063	195	GPRa	NaN
3064	195	GPRa	NaN
3065	195	GPRa	NaN
3066	195	GPRa	80
3067	195	GPRa	NaN
3068	195	GPRa	NaN
3069	195	GPRa	NaN
3070	195	GPRa	NaN
3071	195	GPRa	113
3072	195	GPRa	130
3073	195	GPRa	57
3074	195	GPRa	NaN
3075	195	GPRa	101
3076	195	GPRa	NaN
3077	195	GPRa	NaN
3078	195	GPRa	NaN
3079	195	GPRa	NaN
3080	195	GPRa	NaN
3081	195	GPRa	NaN
3082	195	GPRa	NaN
3083	195	GPRa	NaN
3084	195	GPRa	NaN
3085	195	GPRa	NaN
3086	195	GPRa	NaN
3087	195	GPRa	NaN
3088	195	GPRa	1289
3089	195	GPRa	NaN
3090	195	GPRa	NaN
3091	195	GPRa	NaN
3092	195	GPRa	NaN
3093	195	GPRa	NaN
3094	195	GPRa	496
3095	195	GPRa	NaN
3096	195	GPRa	179
3097	195	GPRa	NaN
3098	195	GPRa	NaN
3099	195	GPRa	NaN
3100	195	GPRa	NaN
3101	195	GPRa	NaN
3102	195	GPRa	NaN
3103	195	GPRa	NaN
3104	195	GPRa	NaN
3105	195	GPRa	328
3106	195	GPRa	NaN
3107	195	GPRa	NaN
3108	195	GPRa	NaN
3109	195	GPRa	NaN
3110	195	GPRa	NaN
3111	195	GPRa	155
3112	195	GPRa	NaN
3113	195	GPRa	1273
3114	195	GPRa	460
3115	195	GPRa	NaN
3116	195	GPRa	424
3117	195	GPRa	253
3118	195	GPRa	122
3119	195	GPRa	54
3120	195	GPRa	NaN
3121	195	GPRa	NaN
3122	195	GPRa	NaN
3123	195	GPRa	268
3124	195	GPRa	NaN
3125	195	GPRa	NaN
3126	195	GPRa	NaN
3127	195	GPRa	NaN
3128	195	GPRa	NaN
3129	195	GPRa	NaN
3130	195	GPRa	NaN
3131	195	GPRa	60
3132	195	GPRa	177
3133	195	GPRa	107
3134	195	GPRa	180
3135	195	GPRa	156
3136	195	GPRa	NaN
3137	195	GPRa	59
3138	195	GPRa	129
3139	195	GPRa	102
3140	195	GPRa	NaN
3141	195	GPRa	114
3142	195	GPRa	24
3143	195	GPRa	69
3144	195	GPRa	NaN
3145	195	GPRa	NaN
3146	195	GPRa	38
3147	195	GPRa	NaN
3148	195	GPRa	NaN
3149	195	GPRa	NaN
3150	195	GPRa	292
3151	195	GPRa	173
3152	195	GPRa	95
3153	195	GPRa	295
3154	195	GPRa	NaN
3155	195	GPRa	148
3156	195	GPRa	174
3157	195	GPRa	NaN
3158	195	GPRa	55
3159	195	GPRa	54
3160	195	GPRa	80
3161	195	GPRa	208
3162	195	GPRa	362
3163	195	GPRa	161
3164	195	GPRa	NaN
3165	195	GPRa	194
3166	195	GPRa	233
3167	195	GPRa	226
3168	195	GPRa	NaN
3169	195	GPRa	NaN
3170	195	GPRa	NaN
3171	195	GPRa	NaN
3172	195	GPRa	NaN
3173	195	GPRa	NaN
3174	195	GPRa	NaN
3175	195	GPRa	NaN
3176	195	GPRa	NaN
3177	195	GPRa	112
3178	195	GPRa	NaN
3179	195	GPRa	NaN
3180	195	GPRa	NaN
3181	195	GPRa	NaN
3182	195	GPRa	NaN
3183	195	GPRa	NaN
3184	195	GPRa	NaN
3185	195	GPRa	NaN
3186	195	GPRa	NaN
3187	195	GPRa	NaN
3188	195	GPRa	NaN
3189	195	GPRa	NaN
3190	195	GPRa	95
3191	195	GPRa	NaN
3192	195	GPRa	NaN
3193	195	GPRa	253
3194	195	GPRa	211
3195	195	GPRa	165
3196	195	GPRa	214
3197	195	GPRa	162
3198	195	GPRa	102
3199	195	GPRa	45
3200	195	GPRa	128
3201	195	GPRa	81
3202	195	GPRa	48
3203	195	GPRa	239
3204	195	GPRa	230
3205	195	GPRa	NaN
3206	195	GPRa	8
3207	195	GPRa	151
3208	195	GPRa	153
3209	195	GPRa	124
3210	195	GPRa	NaN
3211	195	GPRa	341
3212	195	GPRa	172
3213	195	GPRa	106
3214	195	GPRa	95
3215	195	GPRa	NaN
3216	195	GPRa	NaN
3217	195	GPRa	190
3218	195	GPRa	NaN
3219	195	GPRa	170
3220	195	GPRa	NaN
3221	195	GPRa	NaN
3222	195	GPRa	NaN
3223	195	GPRa	142
3224	195	GPRa	NaN
3225	195	GPRa	NaN
3226	195	GPRa	NaN
3227	195	GPRa	NaN
3228	195	GPRa	NaN
3229	195	GPRa	165
3230	195	GPRa	NaN
3231	195	GPRa	NaN
3232	195	GPRa	NaN
3233	195	GPRa	NaN
3234	195	GPRa	NaN
3235	195	GPRa	NaN
3236	195	GPRa	NaN
3237	195	GPRa	NaN
3238	195	GPRa	145
3239	195	GPRa	NaN
3240	195	GPRa	45
3241	195	GPRa	55
3242	195	GPRa	342
3243	195	GPRa	340
3244	195	GPRa	126
3245	195	GPRa	307
3246	195	GPRa	NaN
3247	195	GPRa	NaN
3248	195	GPRa	NaN
3249	195	GPRa	NaN
3250	195	GPRa	NaN
3251	195	GPRa	NaN
3252	195	GPRa	NaN
3253	195	GPRa	NaN
3254	195	GPRa	NaN
3255	195	GPRa	NaN
3256	195	GPRa	NaN
3257	195	GPRa	NaN
3258	195	GPRa	329
3259	195	GPRa	NaN
3260	195	GPRa	NaN
3261	195	GPRa	NaN
3262	195	GPRa	NaN
3263	195	GPRa	NaN
3264	195	GPRa	NaN
3265	195	GPRa	NaN
3266	195	GPRa	NaN
3267	195	GPRa	NaN
3268	195	GPRa	NaN
3269	195	GPRa	NaN
3270	195	GPRa	NaN
3271	195	GPRa	NaN
3272	195	GPRa	536
3273	195	GPRa	202
3274	195	GPRa	386
3275	195	GPRa	210
3276	195	GPRa	327
3277	195	GPRa	NaN
3278	195	GPRa	217
3279	195	GPRa	NaN
3280	195	GPRa	NaN
3281	195	GPRa	NaN
3282	195	GPRa	468
3283	195	GPRa	NaN
3284	195	GPRa	NaN
3285	195	GPRa	NaN
3286	195	GPRa	NaN
3287	195	GPRa	NaN
3288	195	GPRa	NaN
3289	195	GPRa	NaN
3290	195	GPRa	NaN
3291	195	GPRa	NaN
3292	195	GPRa	NaN
3293	195	GPRa	NaN
3294	195	GPRa	NaN
3295	195	GPRa	NaN
3296	195	GPRa	NaN
3297	195	GPRa	NaN
3298	195	GPRa	NaN
3299	195	GPRa	NaN
3300	195	GPRa	NaN
3301	195	GPRa	NaN
3302	195	GPRa	NaN
3303	195	GPRa	NaN
3304	195	GPRa	NaN
3305	195	GPRa	NaN
3306	195	GPRa	NaN
3307	195	GPRa	NaN
3308	195	GPRa	NaN
3309	195	GPRa	NaN
3310	195	GPRa	NaN
3311	195	GPRa	NaN
3312	195	GPRa	NaN
3313	195	GPRa	NaN
3314	195	GPRa	NaN
3315	195	GPRa	NaN
3316	195	GPRa	NaN
3317	195	GPRa	NaN
3318	195	GPRa	NaN
3319	195	GPRa	NaN
3320	195	GPRa	NaN
3321	195	GPRa	NaN
3322	195	GPRa	NaN
3323	195	GPRa	NaN
3324	195	GPRa	NaN
3325	195	GPRa	NaN
3326	195	GPRa	NaN
3327	195	GPRa	NaN
3328	195	GPRa	NaN
3329	195	GPRa	NaN
3330	195	GPRa	NaN
3331	195	GPRa	NaN
3332	195	GPRa	NaN
3333	195	GPRa	NaN
3334	195	GPRa	NaN
3335	195	GPRa	NaN
3336	195	GPRa	NaN
3337	195	GPRa	NaN
3338	195	GPRa	NaN
3339	195	GPRa	NaN
3340	195	GPRa	NaN
3341	195	GPRa	NaN
3342	195	GPRa	NaN
3343	195	GPRa	NaN
3344	195	GPRa	NaN
3345	195	GPRa	NaN
3346	195	GPRa	59
3347	195	GPRa	NaN
3348	195	GPRa	55
3349	195	GPRa	NaN
3350	195	GPRa	NaN
3351	195	GPRa	NaN
3352	195	GPRa	NaN
3353	195	GPRa	70
3354	195	GPRa	128
3355	195	GPRa	NaN
3356	195	GPRa	NaN
3357	195	GPRa	NaN
3358	195	GPRa	204
3359	195	GPRa	NaN
3360	195	GPRa	628
3361	195	GPRa	183
3362	195	GPRa	NaN
3363	195	GPRa	NaN
3364	195	GPRa	648
3365	195	GPRa	NaN
3366	195	GPRa	NaN
3367	195	GPRa	NaN
3368	195	GPRa	338
3369	195	GPRa	NaN
3370	195	GPRa	360
3371	195	GPRa	410
3372	195	GPRa	272
3373	195	GPRa	702
3374	195	GPRa	NaN
3375	195	GPRa	372
3376	195	GPRa	172
3377	195	GPRa	166
3378	195	GPRa	NaN
3379	195	GPRa	383
3380	195	GPRa	462
3381	195	GPRa	532
3382	195	GPRa	298
3383	195	GPRa	400
3384	195	GPRa	656
3385	195	GPRa	NaN
3386	195	GPRa	NaN
3387	195	GPRa	NaN
3388	195	GPRa	NaN
3389	195	GPRa	NaN
3390	195	GPRa	NaN
3391	195	GPRa	NaN
3392	195	GPRa	128
3393	195	GPRa	956
3394	195	GPRa	231
3395	195	GPRa	192
3396	195	GPRa	116
3397	195	GPRa	115
3398	195	GPRa	205
3399	195	GPRa	748
3400	195	GPRa	649
3401	195	GPRa	876
3402	195	GPRa	NaN
3403	195	GPRa	167
3404	195	GPRa	275
3405	195	GPRa	45
3406	195	GPRa	270
3407	195	GPRa	285
3408	195	GPRa	322
3409	195	GPRa	347
3410	195	GPRa	343
3411	195	GPRa	402
3412	195	GPRa	131
3413	195	GPRa	1039
3414	195	GPRa	549
3415	195	GPRa	177
3416	195	GPRa	582
3417	195	GPRa	407
3418	195	GPRa	506
3419	195	GPRa	523
3420	195	GPRa	237
3421	195	GPRa	265
3422	195	GPRa	560
3423	195	GPRa	791
3424	195	GPRa	NaN
3425	195	GPRa	NaN
3426	195	GPRa	NaN
3427	195	GPRa	383
3428	195	GPRa	351
3429	195	GPRa	NaN
3430	195	GPRa	422
3431	195	GPRa	NaN
3432	195	GPRa	NaN
3433	195	GPRa	NaN
3434	195	GPRa	47
3435	195	GPRa	NaN
3436	195	GPRa	NaN
3437	195	GPRa	NaN
3438	195	GPRa	NaN
3439	195	GPRa	NaN
3440	195	GPRa	NaN
3441	195	GPRa	NaN
3442	195	GPRa	NaN
3443	195	GPRa	NaN
3444	195	GPRa	278
3445	195	GPRa	NaN
3446	195	GPRa	144
3447	195	GPRa	84
3448	195	GPRa	NaN
3449	195	GPRa	535
3450	195	GPRa	169
3451	195	GPRa	84
3452	195	GPRa	360
3453	195	GPRa	NaN
3454	195	GPRa	205
3455	195	GPRa	188
3456	195	GPRa	171
3457	195	GPRa	NaN
3458	195	GPRa	173
3459	195	GPRa	NaN
3460	195	GPRa	416
3461	195	GPRa	NaN
3462	195	GPRa	NaN
3463	195	GPRa	NaN
3464	195	GPRa	414
3465	195	GPRa	NaN
3466	195	GPRa	NaN
3467	195	GPRa	NaN
3468	195	GPRa	NaN
3469	195	GPRa	NaN
3470	195	GPRa	NaN
3471	195	GPRa	NaN
3472	195	GPRa	NaN
3473	195	GPRa	NaN
3474	195	GPRa	146
3475	195	GPRa	NaN
3476	195	GPRa	NaN
3477	195	GPRa	NaN
3478	195	GPRa	172
3479	195	GPRa	NaN
3480	195	GPRa	NaN
3481	195	GPRa	429
3482	195	GPRa	NaN
3483	195	GPRa	NaN
3484	195	GPRa	NaN
3485	195	GPRa	218
3486	195	GPRa	133
3487	195	GPRa	527
3488	195	GPRa	432
3489	195	GPRa	596
[truncated: 3,142 more rows]
